# Supplementary material for: High-silica zeolite Y: seed-assisted synthesis, characterization and catalytic properties
Source: Royal Society of Chemistry journal article supplement (doi:10.1039/d2qi00246a), 2022-01-01
Supplement: d2qi00246a1.pdf [file d2qi00246a1.pdf]

## Supporting Information

### High-silica zeolite Y: seeds-assisted synthesis, characterization and catalytic properties

Dali Zhu, <sup>[a], [b]</sup> Linying Wang, \* <sup>[a]</sup> Wenhao Cui, <sup>[a], [b]</sup> Juan Tan, \* <sup>[c]</sup> Peng Tian, \* <sup>[a]</sup> Zhongmin Liu <sup>[a]</sup>

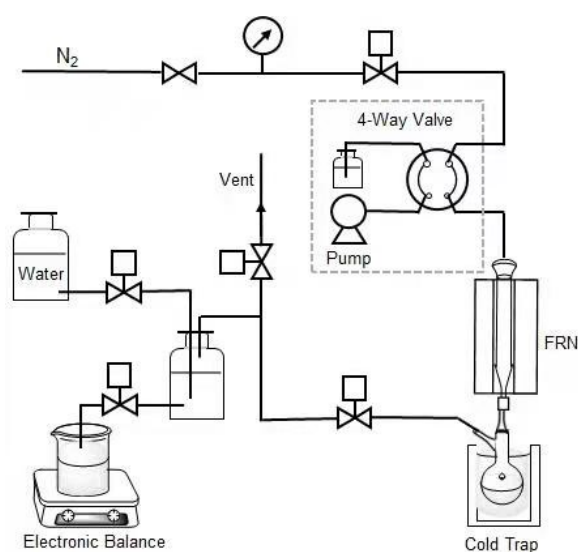

Figure S1. Process flow diagram of heavy oil test system.

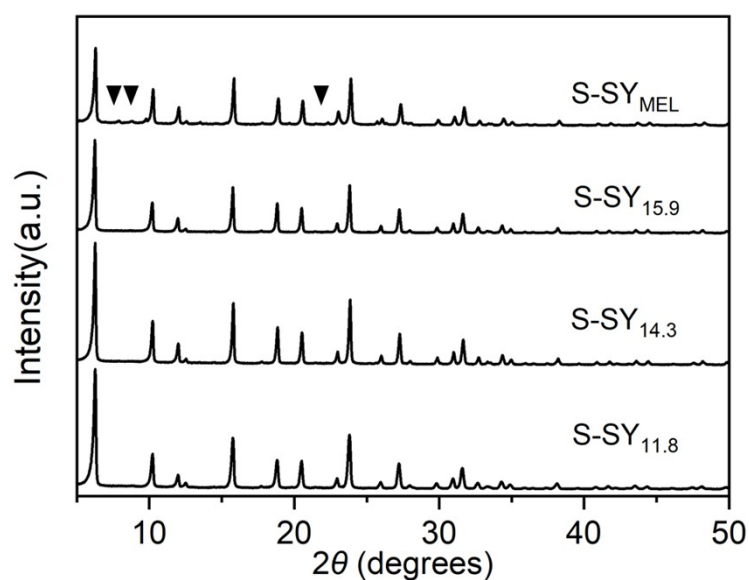

Figure S2. XRD patterns of the as-made S-SY zeolites. Triangle (▼) refers to MEL impurity.

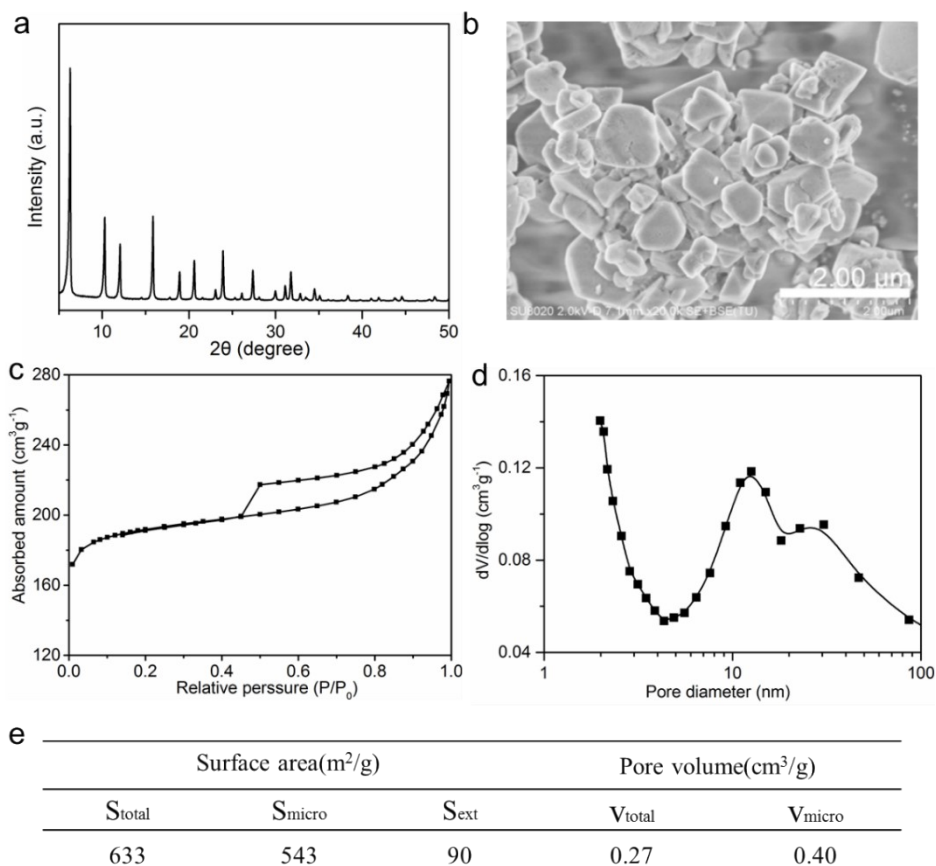

**Figure S3.** Physicochemical properties of commercial ultra-stable zeolite Y (USY, SAR=13.8). (a) XRD pattern, (b) SEM images, (c) N<sub>2</sub> sorption isotherms, (d) BJH pore size distribution, (e) textural properties.

**Table S1.** The properties of heavy oil

| Items                              | Heavy oil |
|------------------------------------|-----------|
| Density (20 °C), g/cm <sup>3</sup> | 0.9144    |
| Viscosity (100 °C), mPa·s          | 26.95     |
| Carbon residue, wt.%               | 5.2       |
| S, wt.%                            | 0.189     |
| N, wt.%                            | 0.072     |
| Saturates, wt.%                    | 53.24     |
| Aromatics, wt.%                    | 29.36     |
| Resins, wt.%                       | 16.96     |
| Asphaltenes, wt.%                  | 0.44      |
| Ni, µg/g                           | 5.87      |
| V, µg/g                            | 4.04      |
| Fe, µg/g                           | 3.57      |
| Cu, µg/g                           | 0.02      |
| Na, µg/g                           | 0.47      |
| Ca, µg/g                           | 0.63      |

**Table S2.** Textural properties of the high-silica products and the seeds employed for the syntheses

| Sample               | Surface area (m <sup>2</sup> g <sup>-1</sup> ) <sup>b</sup> |                    |                    | Pore volume (cm <sup>3</sup> g <sup>-1</sup> ) <sup>b</sup> |                   |                    |
|----------------------|-------------------------------------------------------------|--------------------|--------------------|-------------------------------------------------------------|-------------------|--------------------|
|                      | S <sub>BET</sub>                                            | S <sub>micro</sub> | S <sub>exter</sub> | V <sub>micro</sub>                                          | V <sub>meso</sub> | V <sub>total</sub> |
| NaY                  | 595                                                         | 567                | 28                 | 0.28                                                        | 0.01              | 0.29               |
| Milled NaY           | 180                                                         | 138                | 42                 | 0.07                                                        | 0.16              | 0.23               |
| Y <sub>6.4</sub>     | 746                                                         | 667                | 81                 | 0.33                                                        | 0.08              | 0.41               |
| Y <sub>10.2</sub>    | 652                                                         | 581                | 71                 | 0.28                                                        | 0.07              | 0.35               |
| Y <sub>14.1</sub>    | 672                                                         | 602                | 70                 | 0.29                                                        | 0.01              | 0.38               |
| S-SY <sub>14.3</sub> | 690                                                         | 626                | 64                 | 0.31                                                        | 0.05              | 0.36               |
| S-SY <sub>15.9</sub> | 634                                                         | 592                | 42                 | 0.29                                                        | 0.02              | 0.31               |

<sup>a</sup>) S<sub>BET</sub>: BET surface area, S<sub>micro</sub>: t-plot micropore surface area, S<sub>exter</sub> = S<sub>BET</sub> - S<sub>micro</sub>,

<sup>b</sup>) V<sub>micro</sub>: t-plot micropore volume, V<sub>total</sub>: single point adsorption volume at P/P<sub>0</sub> = 0.97, V<sub>meso</sub>: mesopore volume, V<sub>meso</sub> = V<sub>total</sub> - V<sub>micro</sub>.

**Table S3.** Heavy oil cracking results on S-SY-based catalyst and USY-based catalyst

| Items (wt%)                 | S-SY-based catalyst-<br>17h <sup>a)</sup> | USY-based catalyst-<br>17h <sup>a)</sup> |
|-----------------------------|-------------------------------------------|------------------------------------------|
| Dry gas                     | 0.93                                      | 0.75                                     |
| Liquid petroleum gas (LPG)  | 9.53                                      | 6.43                                     |
| Gasoline                    | 52.78                                     | 52.73                                    |
| Diesel                      | 18.24                                     | 19.08                                    |
| Heavy oil                   | 12.37                                     | 14.50                                    |
| Coke                        | 6.15                                      | 6.52                                     |
| Conversion (excluding coke) | 81.48                                     | 78.98                                    |
| Conversion                  | 87.63                                     | 85.50                                    |
| LPG+Gasoline+Diesel         | 80.55                                     | 78.24                                    |
| Diesel/Gasoline ratio       | 0.34                                      | 0.36                                     |

<sup>a)</sup> The catalysts were aged under 100% steam at 800 °C for 17 h before the catalyst test.
